# Supplementary material for: Anterior chamber enhancement predicts optic nerve infiltration in retinoblastoma
Source: PubMed Central journal article supplement (PMC9668776; doi:10.1007/s00330-022-08778-4), 2022-05-07

$\Delta\text{SIR prescan OFF} \sim \Delta\text{SIR prescan ON}$

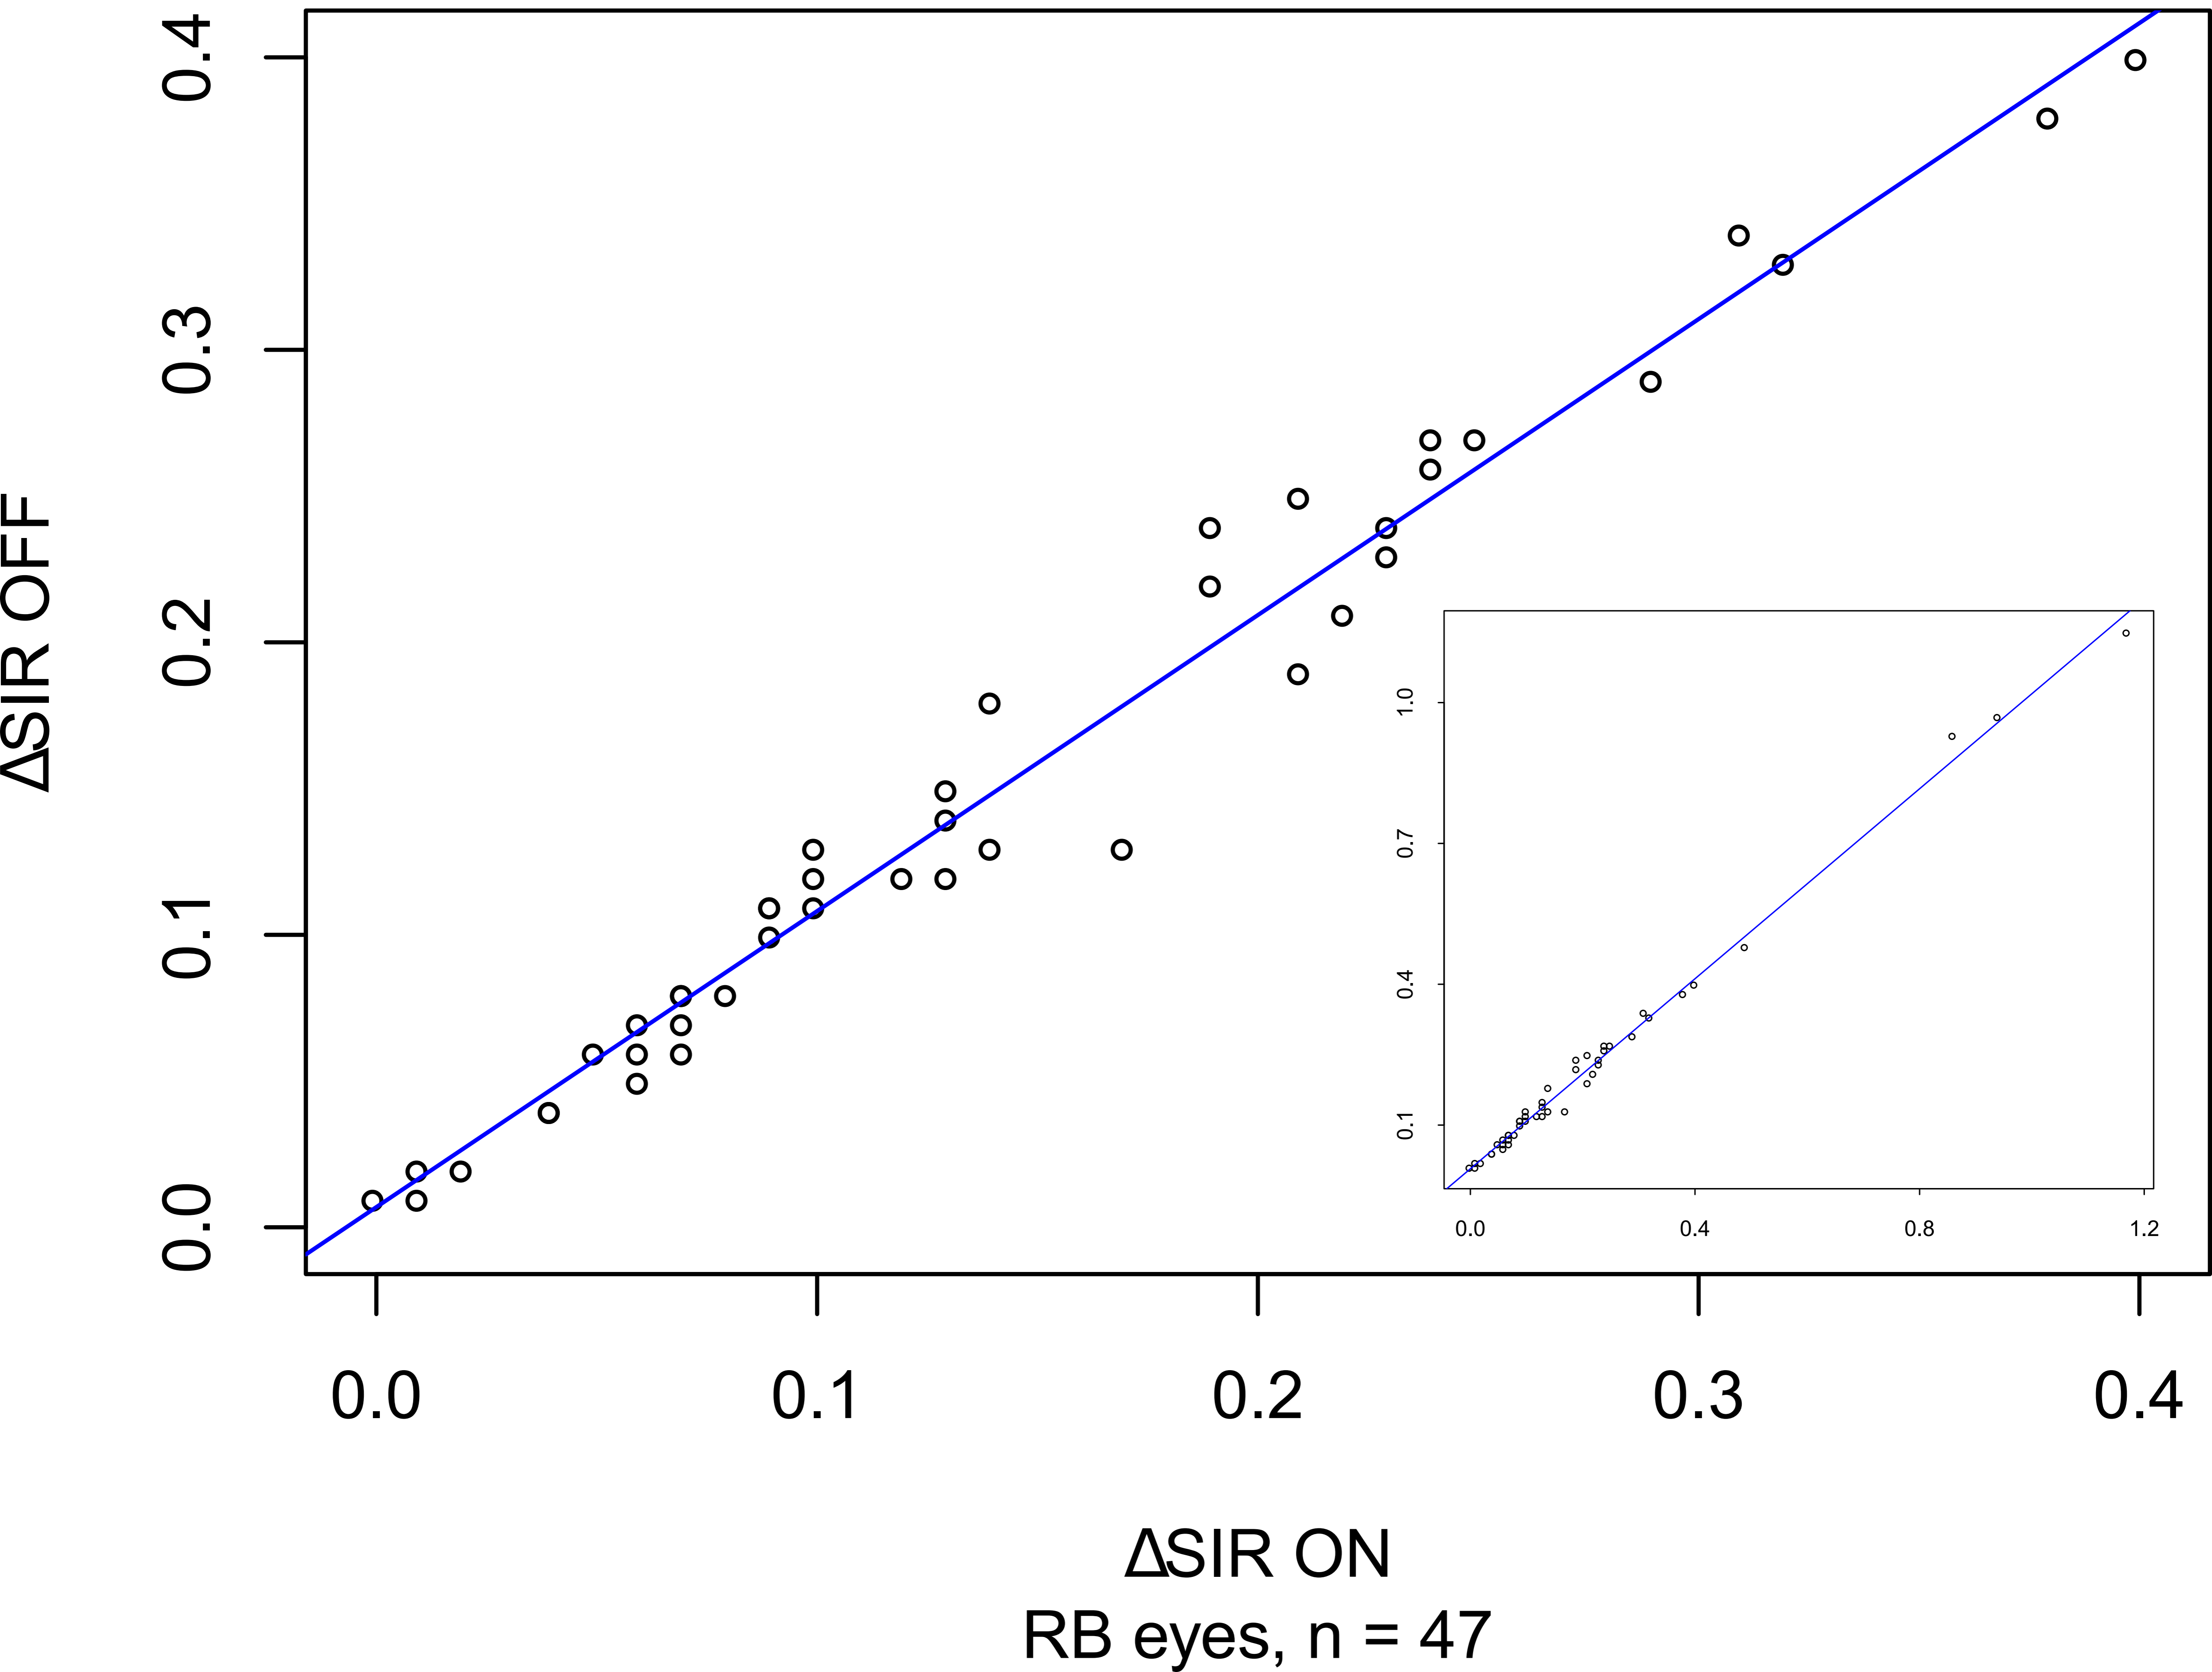

Supplement: 330_2022_8778_MOESM3_ESM.pdf [file 330_2022_8778_MOESM3_ESM.pdf]
